# Supplementary material for: Web-Based Fully Automated Self-Help With Different Levels of Therapist Support for Individuals With Eating Disorder Symptoms: A Randomized Controlled Trial
Source: PubMed Central journal article supplement (PMC4930527; doi:10.2196/jmir.5709), 2016-06-17
Supplement: jmir_v18i6e159_app1.pdf [file jmir_v18i6e159_app1.pdf]

## Specification of statistical models and contrast coding.

### Condition contrasts (CC):

|                                                | <b>CC1</b> | <b>CC2</b> | <b>CC3</b> |
|------------------------------------------------|------------|------------|------------|
| Waiting list control                           | 0          | 0          | 0          |
| Feedback without therapist support             | 1          | 1          | 0          |
| Feedback with low-intensity therapist support  | 1          | -1         | 1          |
| Feedback with high-intensity therapist support | 1          | -1         | -1         |

### Time contrasts (TC):

|                   | <b>TC1</b> | <b>TC2</b> | <b>TC3</b> |
|-------------------|------------|------------|------------|
| Baseline          | -1         | 0          | 0          |
| Post-intervention | 1          | -1         | -1         |
| 3-month follow-up | 0          | 1          | 0          |
| 6-month follow-up | 0          | 0          | 1          |

### Statistical model 1:

CC1 (Feedback with & without therapist support versus waiting list control)

TC1 (Baseline versus post-intervention)

TC2 (Post-intervention versus 3-month follow-up)

CC1\*TC1

CC1\*TC2

### Statistical model 2:

CC2 (Feedback with therapist support versus Feedback without therapist support)

TC1 (Baseline versus post-intervention)

TC2 (Post-intervention versus 3-month follow-up)

TC3 (Post-intervention versus 6-month follow-up)

CC2\*TC1

CC2\*TC2

CC2\*TC3

### Statistical model 3:

CC3 (Feedback with low-intensity versus high-intensity therapist support)

TC1 (Baseline versus post-intervention)

TC2 (Post-intervention versus 3-month follow-up)

TC3 (Post-intervention versus 6-month follow-up)

CC3\*TC1

CC3\*TC2

CC3\*TC3

Bestandsnaam: multimedia app 1  
Map: P:\ehealth\healthdocumenten\featback\artikel\submission 6  
JMIR\submission 3  
Sjabloon: \\FSRC2038\SpaceProfile\$\JAardoo\RESProfile\Sjablonen\Normal.dot  
m  
Titel:  
Onderwerp:  
Auteur: JAardoo  
Trefwoorden:  
Opmerkingen:  
Aanmaakdatum: 14-6-2016 10:37:00  
Wijzigingsnummer: 1  
Laatst opgeslagen op: 14-6-2016 10:37:00  
Laatst opgeslagen door: JAardoo  
Totale bewerkingstijd: 0 minuten  
Laatst afgedrukt op: 14-6-2016 10:37:00  
Vanaf laatste volledige afdruk  
Aantal pagina's: 1  
Aantal woorden: 273 (ong.)  
Aantal tekens: 1.503 (ong.)
