# Supplementary material for: Web-Based Fully Automated Self-Help With Different Levels of Therapist Support for Individuals With Eating Disorder Symptoms: A Randomized Controlled Trial
Source: PubMed Central journal article supplement (PMC4930527; doi:10.2196/jmir.5709), 2016-06-17
Supplement: jmir_v18i6e159_app2.pdf [file jmir_v18i6e159_app2.pdf]

**Non-imputed outcome data (means and standard deviations) in a trial investigating the effectiveness of Internet-based fully automated monitoring- and feedback intervention 'Featback' with different intensities of therapist support and a waiting list control condition.**

| Measure                                          | Waiting list control (n=90) | Featback without therapist support (n=87) | Featback + Low-intensity therapist support (n=88) | Featback + High-intensity therapist support (n=89) |
|--------------------------------------------------|-----------------------------|-------------------------------------------|---------------------------------------------------|----------------------------------------------------|
| <b>Anorectic psychopathology (SEED-AN)</b>       |                             |                                           |                                                   |                                                    |
| Baseline                                         | 1.11 (0.43)                 | 1.07 (0.37)                               | 1.09 (0.42)                                       | 1.11 (0.41)                                        |
| Post-intervention                                | 1.13 (0.41)                 | 1.10 (0.40)                               | 1.14 (0.42)                                       | 1.05 (0.40)                                        |
| 3-Month follow-up                                | 1.03 (0.41)                 | 1.12 (0.42)                               | 1.03 (0.44)                                       | 1.05 (0.36)                                        |
| 6-Month follow-up                                | n/a                         | 1.00 (0.39)                               | 1.01 (0.45)                                       | 1.05 (0.35)                                        |
| <b>Bulimic psychopathology (SEED-BN)</b>         |                             |                                           |                                                   |                                                    |
| Baseline                                         | 1.47 (0.70)                 | 1.41 (0.66)                               | 1.50 (0.72)                                       | 1.49 (0.63)                                        |
| Post-intervention                                | 1.45 (0.69)                 | 1.25 (0.68)                               | 1.27 (0.63)                                       | 1.29 (0.71)                                        |
| 3-Month follow-up                                | 1.27 (0.71)                 | 1.02 (0.67)                               | 1.28 (0.76)                                       | 1.02 (0.70)                                        |
| 6-Month follow-up                                | n/a                         | 0.97 (0.74)                               | 1.25 (0.60)                                       | 0.94 (0.68)                                        |
| <b>Global ED psychopathology (EDE-Q)</b>         |                             |                                           |                                                   |                                                    |
| Baseline                                         | 4.05 (1.11)                 | 4.24 (0.80)                               | 4.43 (0.94)                                       | 3.95 (0.79)                                        |
| Post-intervention                                | 3.92 (1.14)                 | 4.05 (1.00)                               | 3.81 (1.18)                                       | 3.58 (1.32)                                        |
| 3-Month follow-up                                | 3.85 (1.32)                 | 3.53 (1.40)                               | 3.57 (1.37)                                       | 3.50 (1.58)                                        |
| 6-Month follow-up                                | n/a                         | 3.43 (1.50)                               | 3.55 (1.56)                                       | 3.15 (1.67)                                        |
| <b>ED-related quality of life (ED-QOL)</b>       |                             |                                           |                                                   |                                                    |
| Baseline                                         | 2.73 (0.72)                 | 2.75 (0.68)                               | 2.70 (0.53)                                       | 2.65 (0.56)                                        |
| Post-intervention                                | 2.46 (0.73)                 | 2.59 (0.69)                               | 2.55 (0.62)                                       | 2.49 (0.69)                                        |
| 3-Month follow-up                                | 2.35 (0.63)                 | 2.14 (0.69)                               | 2.47 (0.61)                                       | 2.22 (0.66)                                        |
| 6-Month follow-up                                | n/a                         | 2.22 (0.79)                               | 2.39 (0.69)                                       | 1.88 (0.73)                                        |
| <b>Symptoms anxiety &amp; depression (PHQ-4)</b> |                             |                                           |                                                   |                                                    |
| Baseline                                         | 8.14 (3.11)                 | 8.11 (3.12)                               | 8.48 (2.74)                                       | 8.08 (3.06)                                        |
| Post-intervention                                | 7.70 (3.39)                 | 6.50 (3.38)                               | 6.51 (3.53)                                       | 6.79 (3.52)                                        |
| 3-Month follow-up                                | 7.41 (3.50)                 | 5.03 (3.50)                               | 6.07 (3.65)                                       | 6.72 (3.77)                                        |
| 6-Month follow-up                                | n/a                         | 5.00 (3.94)                               | 6.40 (3.65)                                       | 6.29 (3.92)                                        |
| <b>Perseverative thinking (PTQ)</b>              |                             |                                           |                                                   |                                                    |
| Baseline                                         | 2.78 (0.76)                 | 2.79 (0.73)                               | 2.86 (0.70)                                       | 2.78 (0.64)                                        |
| Post-intervention                                | 2.78 (0.86)                 | 2.58 (0.98)                               | 2.46 (1.04)                                       | 2.40 (1.01)                                        |
| 3-Month follow-up                                | 2.52 (1.00)                 | 2.11 (1.02)                               | 2.29 (1.03)                                       | 2.39 (1.04)                                        |
| 6-Month follow-up                                | n/a                         | 2.09 (1.05)                               | 2.33 (1.07)                                       | 2.31 (1.18)                                        |

SEED=Short Examination of Eating Disorders; AN=Anorexia Nervosa; BN=Bulimia Nervosa; EDE-Q=Eating Disorder Examination Questionnaire; ED-QOL=Eating Disorder-related Quality Of Life; PHQ-4=Patient Health Questionnaire; PTQ=Perseverative Thinking Questionnaire

Bestandsnaam: multimedia app 2  
Map: P:\ehealth\healthdocumenten\featback\artikel\submission 6  
JMIR\submission 3  
Sjabloon: \\FSRC2038\SpaceProfile\$\JAardoo\RESProfile\Sjablonen\Normal.dot  
m  
Titel:  
Onderwerp:  
Auteur: JAardoo  
Trefwoorden:  
Opmerkingen:  
Aanmaakdatum: 14-6-2016 10:42:00  
Wijzigingsnummer: 1  
Laatst opgeslagen op: 14-6-2016 10:42:00  
Laatst opgeslagen door: JAardoo  
Totale bewerkingstijd: 0 minuten  
Laatst afgedrukt op: 14-6-2016 10:42:00  
Vanaf laatste volledige afdruk  
Aantal pagina's: 1  
Aantal woorden: 403 (ong.)  
Aantal tekens: 2.219 (ong.)
