# Supplementary material for: Web-Based Fully Automated Self-Help With Different Levels of Therapist Support for Individuals With Eating Disorder Symptoms: A Randomized Controlled Trial
Source: PubMed Central journal article supplement (PMC4930527; doi:10.2196/jmir.5709), 2016-06-17
Supplement: jmir_v18i6e159_app3.pdf [file jmir_v18i6e159_app3.pdf]

**Results of linear mixed model analyses comparing the effectiveness of an Internet-based fully automated monitoring- and feedback intervention with and without therapist support (statistical model 2). Results are based on the pooled results of 100 multiple imputed datasets.**

| Measure                                | Time effects |                       |                | Time x Condition effects |                       |               |
|----------------------------------------|--------------|-----------------------|----------------|--------------------------|-----------------------|---------------|
|                                        | <i>B</i>     | <i>t</i> ( <i>p</i> ) | 95% <i>CI</i>  | <i>B</i>                 | <i>t</i> ( <i>p</i> ) | 95% <i>CI</i> |
| Anorectic psychopathology (SEED-AN)    |              |                       |                |                          |                       |               |
| Baseline to post-intervention          | -0.02        | -1.49 (.14)           | -0.05 to 0.006 | 0.006                    | 0.44 (.66)            | -0.02 to 0.03 |
| Post-intervention to 3-month follow-up | -0.007       | -0.45 (.66)           | -0.04 to 0.02  | 0.02                     | 0.99 (.32)            | -0.02 to 0.05 |
| Post-intervention to 6-month follow-up | -0.04        | -1.93 (.06)           | -0.07 to .001  | -0.02                    | -0.86 (.39)           | -0.05 to 0.02 |
| Bulimic psychopathology (SEED-BN)      |              |                       |                |                          |                       |               |
| Baseline to post-intervention          | -0.21        | -8.07 (<.001)         | -0.26 to -0.16 | -0.006                   | -0.23 (.82)           | -0.06 to 0.05 |
| Post-intervention to 3-month follow-up | -0.08        | -2.81 (.005)          | -0.14 to -0.03 | -0.01                    | -0.35 (.73)           | -0.08 to 0.06 |
| Post-intervention to 6-month follow-up | -0.19        | -4.73(<.001)          | -0.27 to -0.11 | -0.03                    | -0.66 (.51)           | -0.11 to 0.06 |
| Global ED psychopathology (EDE-Q)      |              |                       |                |                          |                       |               |
| Baseline to post-intervention          | -0.40        | -8.45 (<.001)         | -0.49 to -0.31 | 0.05                     | 1.02 (.31)            | -0.05 to 0.15 |
| Post-intervention to 3-month follow-up | -0.11        | -2.53 (.01)           | -0.20 to -0.02 | -0.01                    | -0.23 (.82)           | -0.11 to 0.09 |
| Post-intervention to 6-month follow-up | -0.37        | -5.76 (<.001)         | -0.49 to -0.24 | -0.01                    | -0.23 (.82)           | -0.14 to 0.11 |
| ED-related quality of life (ED-QOL)    |              |                       |                |                          |                       |               |
| Baseline to post-intervention          | -0.22        | -10.51 (<.001)        | -0.27 to -0.18 | -0.005                   | -0.22 (.83)           | -0.05 to 0.04 |
| Post-intervention to 3-month follow-up | -0.09        | -3.70 (<.001)         | -0.14 to -0.04 | -0.02                    | -0.71 (.48)           | -0.07 to 0.03 |
| Post-intervention to 6-month follow-up | -0.22        | -7.46 (<.001)         | -0.27 to -0.16 | -0.01                    | -0.39 (.70)           | -0.07 to 0.05 |
| Symptoms anxiety & depression (PHQ-4)  |              |                       |                |                          |                       |               |
| Baseline to post-intervention          | -1.38        | -11.76 (<.001)        | -1.61 to -1.15 | -0.13                    | -0.94 (.35)           | -0.40 to 0.14 |
| Post-intervention to 3-month follow-up | -0.50        | -3.67 (<.001)         | -0.76 to -0.23 | -0.09                    | -0.58 (.56)           | -0.38 to 0.21 |
| Post-intervention to 6-month follow-up | -0.88        | -5.33 (<.001)         | -1.21 to -0.56 | -0.15                    | -0.94 (.35)           | -0.47 to 0.17 |
| Perseverative thinking (PTQ)           |              |                       |                |                          |                       |               |
| Baseline to post-intervention          | -0.30        | -8.99 (<.001)         | -0.36 to -0.23 | 0.02                     | 0.60 (.55)            | -0.05 to 0.09 |
| Post-intervention to 3-month follow-up | -0.13        | -3.49 (.001)          | -0.20 to -0.06 | -0.03                    | -0.59 (.55)           | -0.11 to 0.06 |
| Post-intervention to 6-month follow-up | -0.23        | -4.74 (<.001)         | -0.33 to -0.13 | -0.005                   | -0.09 (.93)           | -0.10 to 0.09 |

SEED=Short Examination of Eating Disorders; AN=Anorexia Nervosa; BN=Bulimia Nervosa; EDE-Q=Eating Disorder Examination Questionnaire; ED-QOL=Eating Disorder-related Quality Of Life; PHQ-4=Patient Health Questionnaire; PTQ= Perseverative Thinking Questionnaire

Note 1: Values smaller than 0.01 are reported to 3 decimals places.

Note 2: Including the covariates age, duration of eating disorder psychopathology, and number of received psychological health care appointments.

Bestandsnaam: multimedia app 3  
Map: P:\ehealth\healthdocumenten\featback\artikel\submission 6  
JMIR\submission 3  
Sjabloon: \\FSRC2038\SpaceProfile\$\JAardoo\RESProfile\Sjablonen\Normal.dot  
m  
Titel:  
Onderwerp:  
Auteur: JAardoo  
Trefwoorden:  
Opmerkingen:  
Aanmaakdatum: 14-6-2016 10:43:00  
Wijzigingsnummer: 1  
Laatst opgeslagen op: 14-6-2016 10:46:00  
Laatst opgeslagen door: JAardoo  
Totale bewerkingstijd: 3 minuten  
Laatst afgedrukt op: 14-6-2016 10:46:00  
Vanaf laatste volledige afdruk  
Aantal pagina's: 1  
Aantal woorden: 483 (ong.)  
Aantal tekens: 2.659 (ong.)
