# Supplementary material for: Web-Based Fully Automated Self-Help With Different Levels of Therapist Support for Individuals With Eating Disorder Symptoms: A Randomized Controlled Trial
Source: PubMed Central journal article supplement (PMC4930527; doi:10.2196/jmir.5709), 2016-06-17
Supplement: jmir_v18i6e159_app4.pdf [file jmir_v18i6e159_app4.pdf]

**Results of linear mixed model analyses comparing the effectiveness of an Internet-based fully automated monitoring- and feedback intervention with low-intensity (once a week) versus high-intensity (three times a week) therapist support (statistical model 3). Results are based on the pooled results of 100 multiple imputed datasets.**

| Measure                                          | Time effects |                       |                | Time x Condition effects |                       |                |
|--------------------------------------------------|--------------|-----------------------|----------------|--------------------------|-----------------------|----------------|
|                                                  | <i>B</i>     | <i>t</i> ( <i>p</i> ) | 95% <i>CI</i>  | <i>B</i>                 | <i>t</i> ( <i>p</i> ) | 95% <i>CI</i>  |
| <b>Anorectic psychopathology (SEED-AN)</b>       |              |                       |                |                          |                       |                |
| Baseline to post-intervention                    | -0.02        | -1.63 (.10)           | -0.05 to 0.004 | 0.01                     | 0.77 (.44)            | -0.02 to 0.05  |
| Post-intervention to 3-month follow-up           | -0.01        | -0.81 (.42)           | -0.04 to 0.02  | 0.007                    | 0.32 (.75)            | -0.04 to 0.05  |
| Post-intervention to 6-month follow-up           | -0.03        | -1.67 (.10)           | -0.70 to .005  | -0.03                    | -1.28 (.20)           | -0.07 to 0.02  |
| <b>Bulimic psychopathology (SEED-BN)</b>         |              |                       |                |                          |                       |                |
| Baseline to post-intervention                    | -0.21        | -8.48 (<.001)         | -0.25 to -0.16 | 0.05                     | 1.54 (.13)            | -0.01 to 0.11  |
| Post-intervention to 3-month follow-up           | -0.08        | -2.89 (.004)          | -0.14 to -0.03 | 0.03                     | 0.69 (.49)            | -0.05 to 0.11  |
| Post-intervention to 6-month follow-up           | -0.18        | -5.04 (<.001)         | -0.25 to -0.11 | 0.07                     | 1.77 (.08)            | -0.007 to 0.15 |
| <b>Global ED psychopathology (EDE-Q)</b>         |              |                       |                |                          |                       |                |
| Baseline to post-intervention                    | -0.41        | -9.21 (<.001)         | -0.50 to -0.33 | 0.06                     | 1.11 (.27)            | -0.05 to 0.17  |
| Post-intervention to 3-month follow-up           | -0.11        | -2.59 (.01)           | -0.19 to -0.03 | -0.01                    | -0.19 (.85)           | -0.13 to 0.11  |
| Post-intervention to 6-month follow-up           | -0.36        | -6.09 (<.001)         | -0.48 to -0.25 | 0.10                     | 1.41 (.16)            | -0.04 to 0.23  |
| <b>ED-related quality of life (ED-QOL)</b>       |              |                       |                |                          |                       |                |
| Baseline to post-intervention                    | -0.22        | -11.19 (<.001)        | -0.26 to -0.18 | 0.09                     | 3.25 (.001)           | 0.03 to 0.14   |
| Post-intervention to 3-month follow-up           | -0.09        | -3.83 (<.001)         | -0.13 to -0.04 | 0.04                     | 1.44 (.15)            | -0.02 to 0.10  |
| Post-intervention to 6-month follow-up           | -0.21        | -8.13 (<.001)         | -0.26 to -0.16 | 0.08                     | 2.50 (.01)            | 0.02 to 0.15   |
| <b>Symptoms anxiety &amp; depression (PHQ-4)</b> |              |                       |                |                          |                       |                |
| Baseline to post-intervention                    | -1.34        | -12.17 (<.001)        | -1.56 to -1.12 | -0.20                    | -1.33 (.18)           | -0.51 to 0.10  |
| Post-intervention to 3-month follow-up           | -0.49        | -3.84 (<.001)         | -0.73 to -0.23 | -0.23                    | -1.31 (.19)           | -0.57 to 0.11  |
| Post-intervention to 6-month follow-up           | -0.83        | -5.56 (<.001)         | -1.12 to -0.54 | 0.09                     | 0.52 (.61)            | -0.26 to 0.44  |
| <b>Perseverative thinking (PTQ)</b>              |              |                       |                |                          |                       |                |
| Baseline to post-intervention                    | -0.30        | -9.56 (<.001)         | -0.36 to -0.24 | 0.004                    | 0.84 (.93)            | -0.08 to 0.09  |
| Post-intervention to 3-month follow-up           | -0.12        | -3.56 (<.001)         | -0.19 to -0.05 | -0.03                    | -0.56 (.58)           | -0.12 to 0.07  |
| Post-intervention to 6-month follow-up           | -0.23        | -5.06 (<.001)         | -0.32 to -0.14 | 0.01                     | 0.28 (.78)            | -0.09 to 0.12  |

SEED=Short Examination of Eating Disorders; AN=Anorexia Nervosa; BN=Bulimia Nervosa; EDE-Q=Eating Disorder Examination Questionnaire; ED-QOL=Eating Disorder-related Quality Of Life; PHQ-4=Patient Health Questionnaire; PTQ= Perseverative Thinking Questionnaire

Note 1: Values smaller than 0.01 are reported to 3 decimals places.

Note 2: Including the covariates age, duration of eating disorder psychopathology, and number of received psychological health care appointments



Bestandsnaam: multimedia app 4  
Map: P:\ehealth\healthdocumenten\featback\artikel\submission 6  
JMIR\submission 3  
Sjabloon: \\FSRC2038\SpaceProfile\$\JAardoo\RESProfile\Sjablonen\Normal.dot  
m  
Titel:  
Onderwerp:  
Auteur: JAardoo  
Trefwoorden:  
Opmerkingen:  
Aanmaakdatum: 14-6-2016 10:51:00  
Wijzigingsnummer: 1  
Laatst opgeslagen op: 14-6-2016 10:52:00  
Laatst opgeslagen door: JAardoo  
Totale bewerkingstijd: 1 minuut  
Laatst afgedrukt op: 14-6-2016 10:52:00  
Vanaf laatste volledige afdruk  
Aantal pagina's: 2  
Aantal woorden: 491 (ong.)  
Aantal tekens: 2.703 (ong.)
